# Supplementary material for: Single-step flame synthesis of carbon nanoparticles with tunable structure and chemical reactivity
Source: Royal Society of Chemistry journal article supplement (doi:10.1039/c6ra06436a), 2016-01-01
Supplement: c6ra06436a1.pdf [file c6ra06436a1.pdf]

## **Single-Step Flame Synthesis of Carbon Nanoparticles with Tunable Structure and Chemical Reactivity**

Karekin D. Esmeryan<sup>a, b</sup>, Carlos E. Castano<sup>a, c</sup>, Ashton H. Bressler<sup>a</sup>, Christian P. Fergusson<sup>a</sup> and  
Reza Mohammadi<sup>\*a</sup>

<sup>a</sup>Department of Mechanical and Nuclear Engineering, Virginia Commonwealth University,  
Richmond VA, 23284, USA

<sup>b</sup>Georgi Nadjakov Institute of Solid State Physics, 72, Tzarigradsko Chaussee Blvd., 1784 Sofia,  
Bulgaria

<sup>c</sup>Nanomaterials Core Characterization Facility, Department of Chemical and Life Science  
Engineering, Virginia Commonwealth University, Richmond VA, 23284, USA

\*Corresponding author: [rmohammadi@vcu.edu](mailto:rmohammadi@vcu.edu);

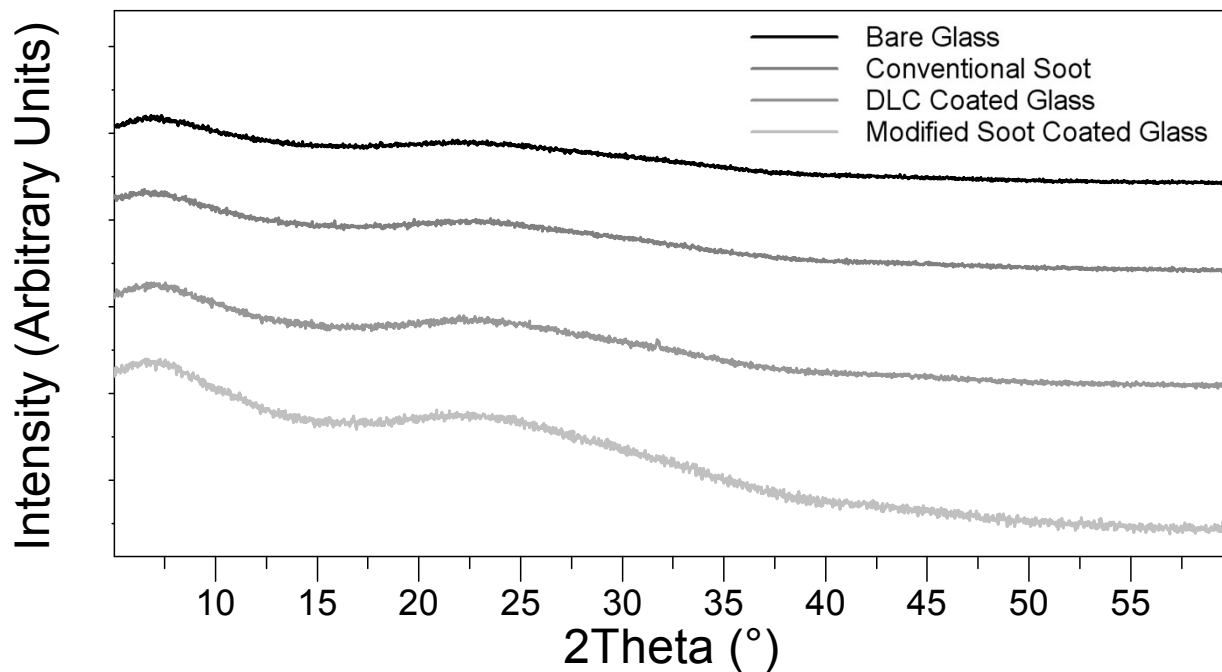

**Figure S1:** X-ray diffraction of a bare microscope glass slide and after its coverage with carbon coatings synthesized by the conventional (with no chimney) and modified (with chimney) approach.

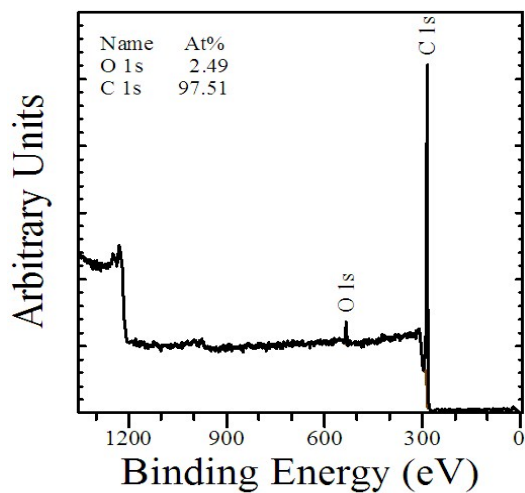

a)

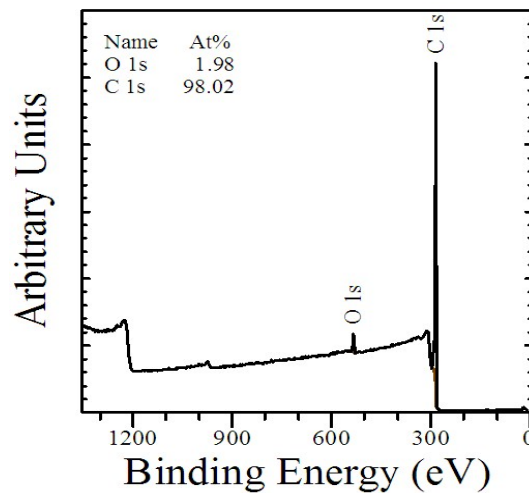

b)

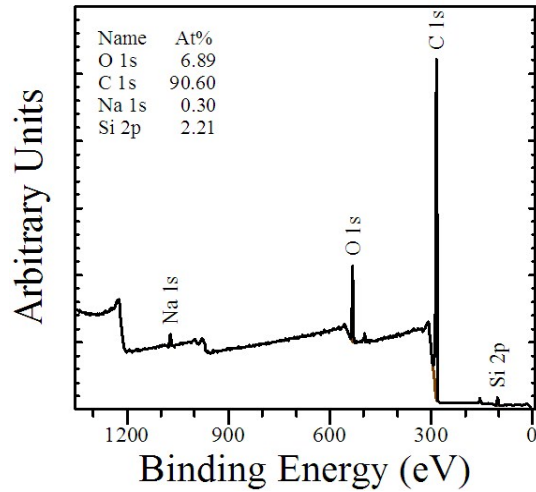

c)

**Figure S2:** XPS scan survey of carbon coatings deposited after modification with chimney at a) fully-open, b) half-open and c) fully-closed opening.

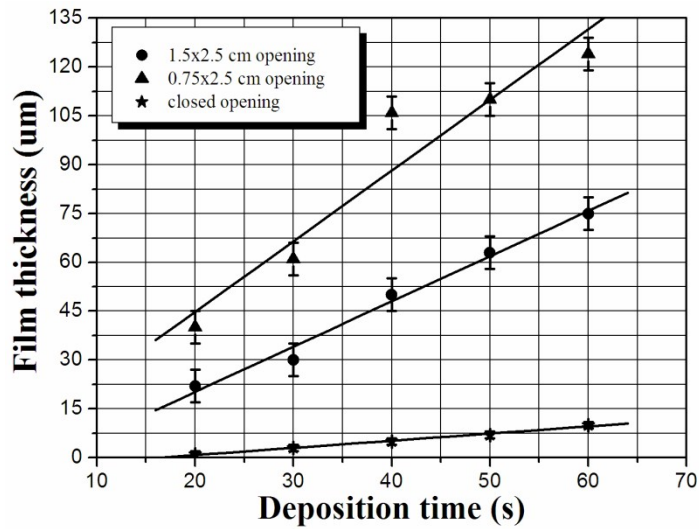

**Figure S3:** Relation between the film thickness and the deposition time for each regime of combustion.

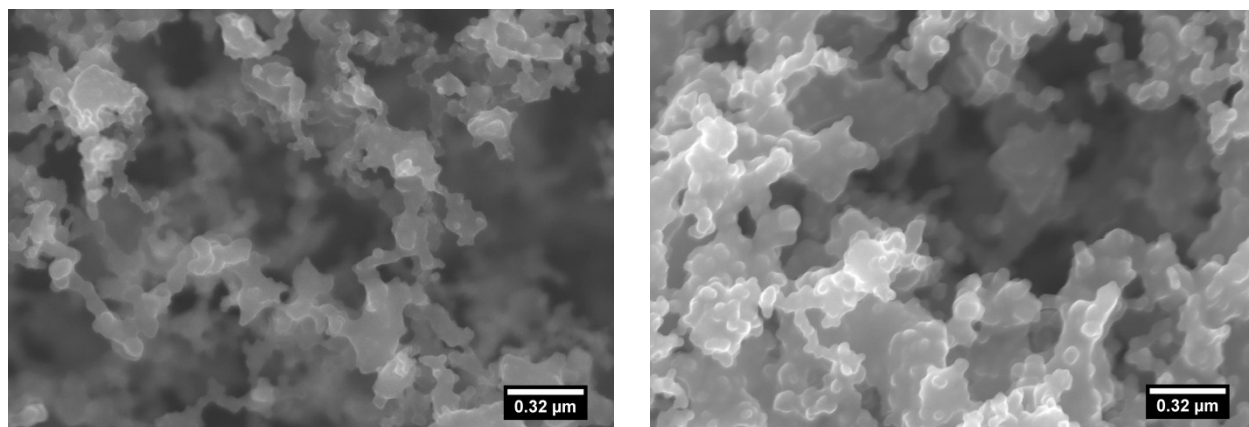

a)

b)

**Figure S4:** High-resolution SEM images of carbon nanoparticles deposited at fully-open opening a) prior to and b) after chemical treatment with ethanol.

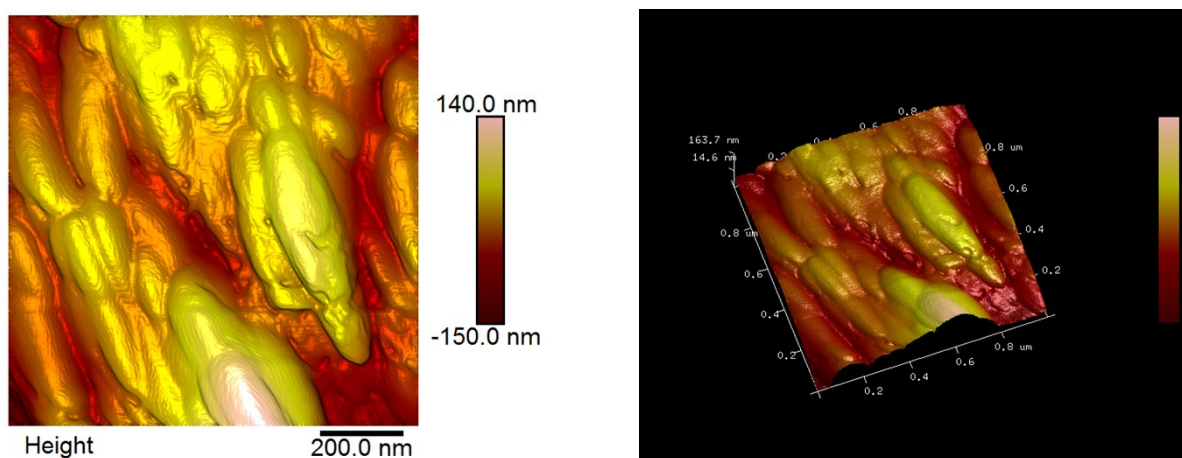

a)

b)

**Figure S5:** a) 2-D and b) 3-D AFM images of carbon coatings with a short-range ordered nanocrystalline diamond-like structure.
